# Supplementary material
Source: PubMed Central journal article supplement (PMC6205742)

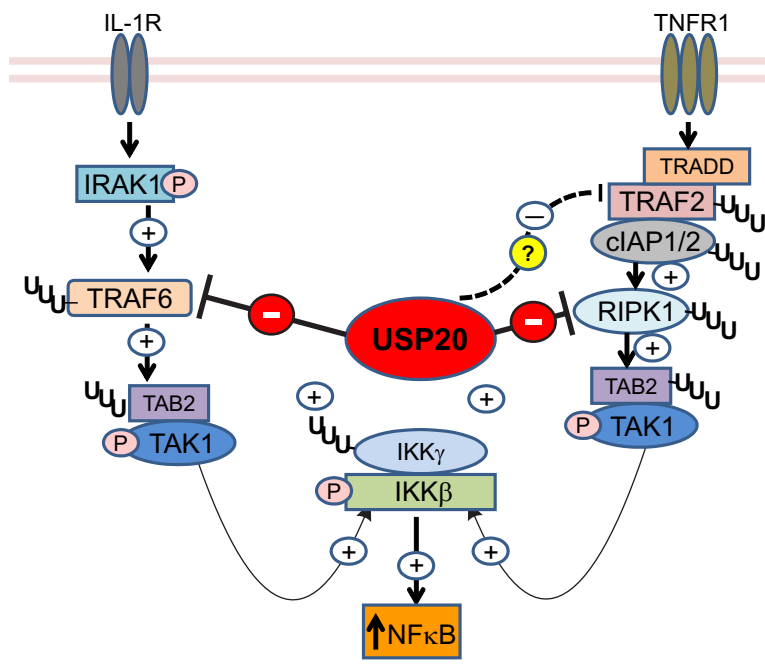

Supplement: NIHMS1502303-supplement-Graphic_Abstract.pdf [file NIHMS1502303-supplement-Graphic_Abstract.pdf]
